# Supplementary material for: Systematic review and meta-analysis: cholecystectomy and the risk of cholangiocarcinoma
Source: PubMed Central journal article supplement (PMC5601764; doi:10.18632/oncotarget.19570), 2017-07-26
Supplement: oncotarget-08-59648-s001.pdf [file oncotarget-08-59648-s001.pdf]

## Systematic review and meta-analysis: cholecystectomy and the risk of cholangiocarcinoma

### SUPPLEMENTARY MATERIALS

**Supplementary Table 1: Scores of the newcastle-ottawa scale for cohort studies**

| Study/Years of Publication | representativeness of exposed cohort | Selection of the non-exposed cohort | Determination of exposure | outcome not present at study start | Controlling the important factors or confounding factors | Assessment of outcome | Follow-up long enough for outcome to occur | Integrity of follow up | Total score |
|----------------------------|--------------------------------------|-------------------------------------|---------------------------|------------------------------------|----------------------------------------------------------|-----------------------|--------------------------------------------|------------------------|-------------|
| Nogueira.2014              | *                                    | *                                   | *                         |                                    | *                                                        | *                     |                                            | *                      | 6           |
| Nordenstedt.2012           | *                                    | *                                   | *                         |                                    | **                                                       | *                     | *                                          | *                      | 8           |
| Chow.1999                  | *                                    | *                                   |                           | *                                  | **                                                       | *                     |                                            | *                      | 7           |
| Nechuta .2012              | *                                    | *                                   | *                         | *                                  | *                                                        | *                     | *                                          | *                      | 8           |

**Supplementary Table 2: Scores of the newcastle-ottawa scale for case control studies**

| Study/Years of Publication | Fully defined cases | Representative cases | Selection of controls | Definition of controls | Controlling the important factors or confounding factors. | Determination of exposure | Same method of determination for cases and control | Non-response rate | Total score |
|----------------------------|---------------------|----------------------|-----------------------|------------------------|-----------------------------------------------------------|---------------------------|----------------------------------------------------|-------------------|-------------|
| Lee.2015                   | *                   | *                    |                       | *                      | **                                                        |                           | *                                                  |                   | 6           |
| Zhang.2014                 | *                   | *                    | *                     |                        | **                                                        | *                         | *                                                  |                   | 7           |
| WELZEL.2007                | *                   | *                    |                       | *                      | **                                                        | *                         | *                                                  | *                 | 8           |
| Tao.2009                   | *                   | *                    |                       | *                      | **                                                        | *                         | *                                                  | *                 | 8           |
| WELZEL.2006                | *                   | *                    | *                     | *                      | **                                                        | *                         | *                                                  |                   | 8           |
| Cai.2011                   | *                   | *                    | *                     |                        | **                                                        |                           | *                                                  | *                 | 7           |
| Zhou.2013                  | *                   | *                    | *                     |                        | **                                                        |                           | *                                                  | *                 | 7           |
| CHALASANI.2000             | *                   |                      |                       | *                      | *                                                         | *                         |                                                    | *                 | 5           |
| Liu.2011                   | *                   | *                    |                       | *                      | **                                                        | *                         | *                                                  | *                 | 8           |
| Kuper.2001                 | *                   | *                    | *                     |                        | **                                                        |                           | *                                                  |                   | 6           |
| Shaib.2007                 | *                   | *                    | *                     |                        | **                                                        |                           | *                                                  | *                 | 7           |
| Peng.2011                  | *                   | *                    |                       | *                      | **                                                        | *                         | *                                                  | *                 | 8           |
